# Supplementary material for: Catalytic water oxidation based on Ag(i)-substituted Keggin polyoxotungstophosphate
Source: Royal Society of Chemistry journal article supplement (doi:10.1039/c4dt01538j), 2014-01-01
Supplement: c4dt01538j2.pdf [file c4dt01538j2.pdf]

## Supporting Information

### Catalytic Water Oxidation Based on Ag(I)-Substituted Keggin Polyoxotungstophosphate

Ying Cui,<sup>a</sup> Lei Shi,<sup>a</sup> Yanyi Yang,<sup>a</sup> Wansheng You,<sup>\*a</sup> Lancui Zhang,<sup>a</sup> Zaiming Zhu,<sup>a</sup> Meiyong Liu,<sup>a</sup>  
Licheng Sun<sup>\*b</sup>

<sup>a</sup>*Institute of Chemistry for Functionalized Materials, Liaoning Normal University, 850 Huanghe Road, Dalian 116029, P. R. China. Fax: +86 411 82159378; Tel: +86 411 82158559; E-mail: wsyoun@lnnu.edu.cn*

<sup>b</sup>*State Key Laboratory of Fine Chemicals, Dalian University of Technology, Dalian 116024, P. R. China; E-mail: sunlc@dlut.edu.cn*

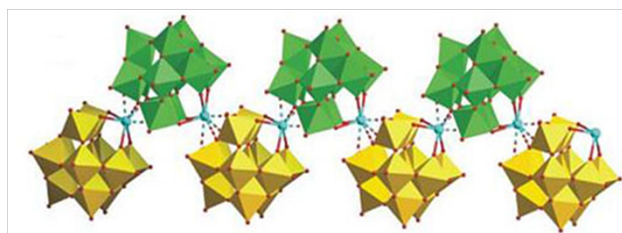

**Fig. S1.** View of a 1D chain-like structure of  $[H_3AgPW_{11}O_{39}]^{3-}$  in the crystal. Polyhedra:  $[PW_{11}O_{39}]^{7-}$ ; blue balls:  $Ag^{+}$ .

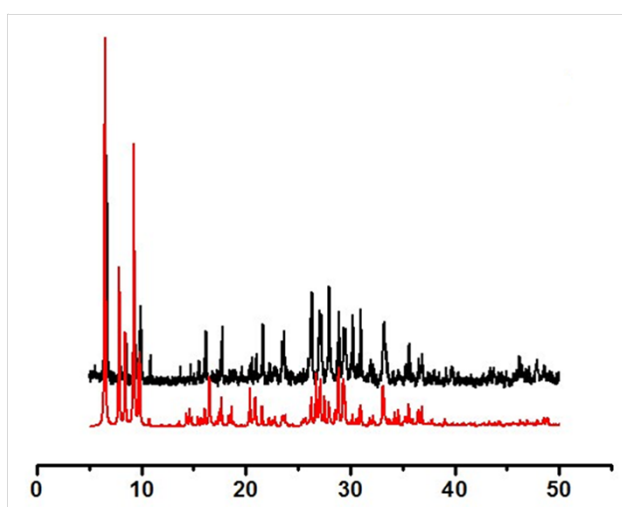

**Fig. S2.** XRD patterns of  $K_3[H_3AgPW_{11}O_{39}] \cdot 12H_2O$  (red: simulated; black: experimental).

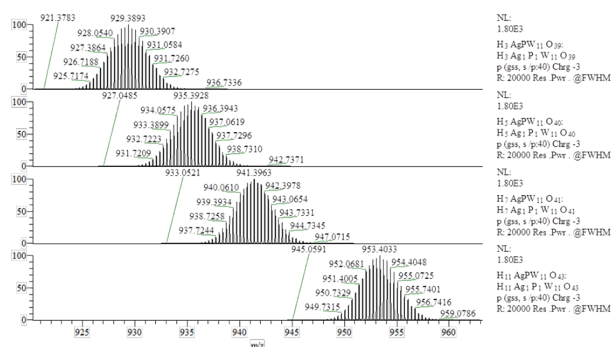

**Fig. S3.** The simulated isotopic patterns at  $m/z = 929.7239, 935.3751, 941.3730$  and  $953.0261$  for MS analysis.

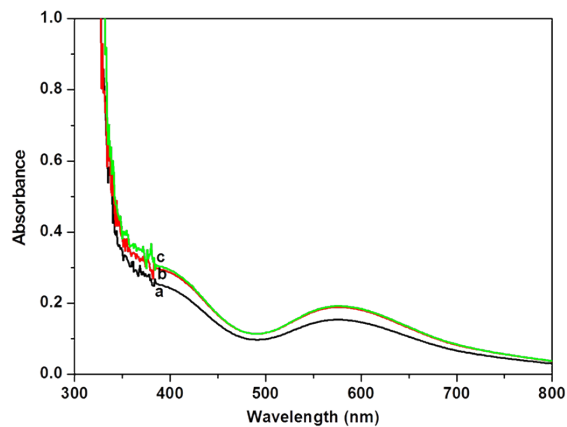

**Fig. S4.** UV-visible spectra of a solution of  $\text{K}_3[\text{H}_3\text{AgPW}_{11}\text{O}_{39}] \cdot 12\text{H}_2\text{O}$  (2 mM) and  $\text{Na}_2\text{S}_2\text{O}_8$  ( $8.8 \times 10^{-2}$  M) when the solution lasts a: 45 mins; b: 1 h; c: 6 hs.

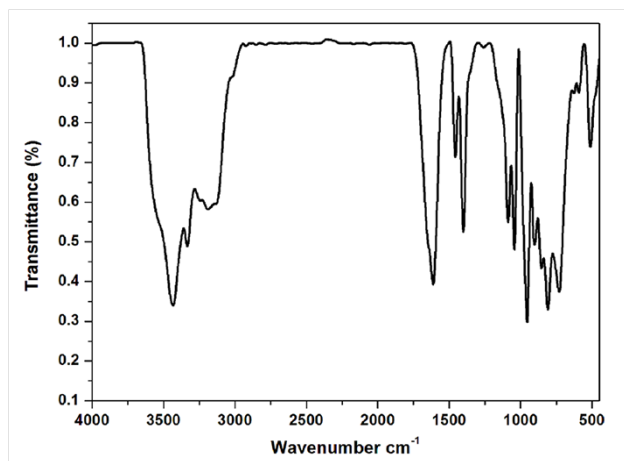

**Fig. S5.** FT-IR spectrum of  $\text{K}_3[\text{H}_3\text{AgPW}_{11}\text{O}_{39}] \cdot 12\text{H}_2\text{O}$ .

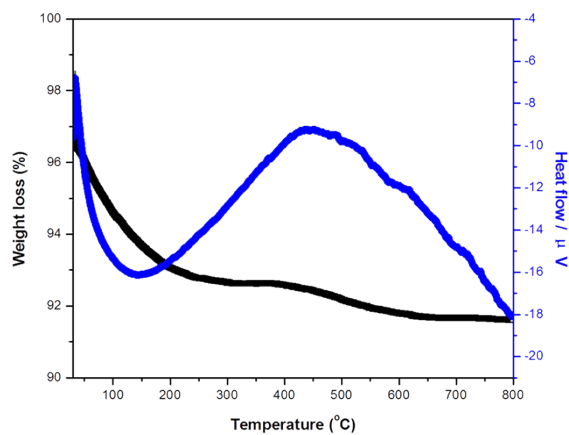

**Fig. S6.** TG/DTA analysis of  $\text{K}_3[\text{H}_3\text{AgPW}_{11}\text{O}_{39}] \cdot 12\text{H}_2\text{O}$ .

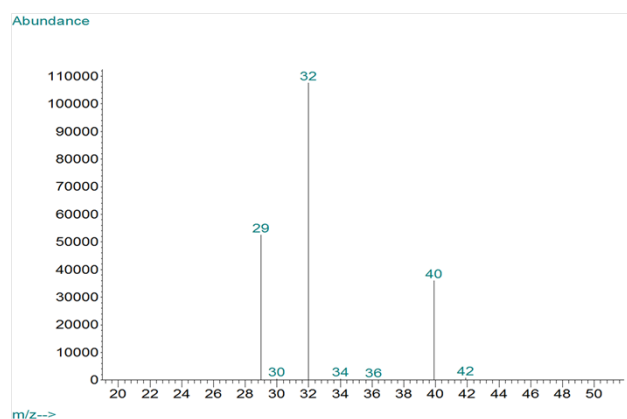

**Fig. S7.** EI mass spectrum of the gas sample evolved from the catalytic oxidation in 1 M phosphate buffer solution (pH = 5.5) (12 mL) prepared with normal water containing  $\text{K}_3[\text{H}_3\text{Ag}^{\text{I}}\text{PW}_{11}\text{O}_{39}] \cdot 12\text{H}_2\text{O}$  (2 mM) and  $\text{Na}_2\text{S}_2\text{O}_8$  ( $8.8 \times 10^{-2}$  M) at 25 °C. The ions with  $m/z = 28, 32, 34, 36$  and 40 were monitored selectively.

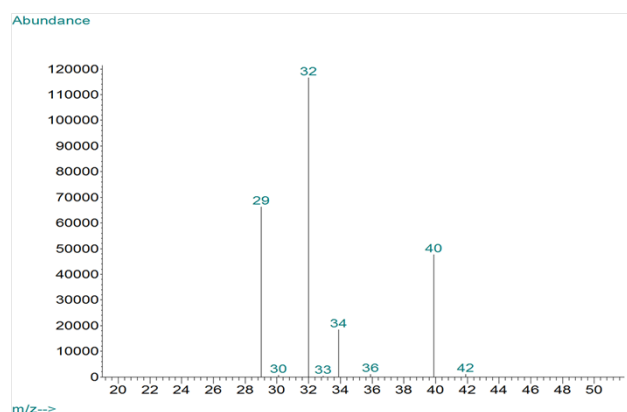

**Fig. S8.** EI mass spectrum of the gas sample evolved during the catalytic oxidation from the catalytic oxidation in 1 M phosphate buffer solution (pH = 5.5) (12 mL) prepared with  $\text{H}_2^{18}\text{O}$ -enriched water (8.3%  $\text{H}_2^{18}\text{O}$ ) containing  $\text{K}_3[\text{H}_3\text{Ag}^{\text{I}}\text{PW}_{11}\text{O}_{39}] \cdot 12\text{H}_2\text{O}$  (2 mM) and  $\text{Na}_2\text{S}_2\text{O}_8$  ( $8.8 \times 10^{-2}$  M). The ions with  $m/z = 28, 32, 34, 36$  and 40 were monitored selectively.

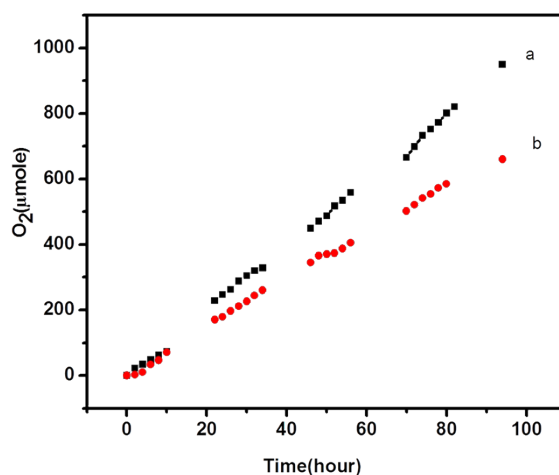

**Fig. S9.** Time course of O<sub>2</sub> evolution from 200 ml of 17.6×10<sup>-2</sup> M Na<sub>2</sub>S<sub>2</sub>O<sub>8</sub> solution containing 0.05 mM of a: K<sub>3</sub>[H<sub>3</sub>AgPW<sub>11</sub>O<sub>39</sub>]·12H<sub>2</sub>O b: AgNO<sub>3</sub> in 1 M phosphate buffer solution (pH = 5.5) at (24.5 ± 0.5) °C.

**Table S1.** Crystallographic data of K<sub>3</sub>[H<sub>3</sub>AgPW<sub>11</sub>O<sub>39</sub>]·12H<sub>2</sub>O

| <i>formula</i>                          | <i>H<sub>27</sub> Ag K<sub>3</sub> O<sub>51</sub> P W<sub>11</sub></i> |
|-----------------------------------------|------------------------------------------------------------------------|
| formula weight                          | 3121.71                                                                |
| T(K)                                    | 296(2)                                                                 |
| crystal system, space group             | Orthorhombic, Pna2(1)                                                  |
| a,b,c (Å)                               | 17.9123(12), 20.9333(13), 13.3253(9)                                   |
| α /β /γ (°)                             | 90,90,90                                                               |
| V (Å <sup>3</sup> ), Z                  | 4996.5(6), 4                                                           |
| D <sub>c</sub> (mg/m <sup>3</sup> )     | 4.150                                                                  |
| <i>F</i> (000)                          | 5472.0                                                                 |
| Data / restraints / parameters          | 11334 / 56 / 613                                                       |
| GOF on F <sup>2</sup>                   | 1.104                                                                  |
| R <sub>1</sub> [I>2σ(I)] <sup>a</sup>   | R <sub>1</sub> = 0.0372, wR <sub>2</sub> = 0.1029                      |
| wR <sub>2</sub> (all data) <sup>b</sup> | R <sub>1</sub> = 0.0498, wR <sub>2</sub> = 0.0958                      |

<sup>a</sup>  $R_1 = \frac{\sum ||F_0| - |F_c||}{\sum |F_0|}$ . <sup>b</sup>  $wR_2 = \left[ \frac{\sum \omega(F_0^2 - F_c^2)^2}{\sum \omega(F_0^2)^2} \right]^{1/2}$ .

**Table S2.** List of m/z peak assignments in the ESI-MS spectra of  $K_3[H_3Ag^I PW_{11}O_{39}] \cdot 12H_2O$  solution

| Peak assignments                              | Observed m/z | Calculated m/z |
|-----------------------------------------------|--------------|----------------|
| $[H_3AgPW_{11}O_{39}]^{3-}$                   | 929.7239     | 929.3893       |
| $[H_3Ag(H_2O)PW_{11}O_{39}]^{3-}$             | 935.3715     | 935.3928       |
| $[H_3Ag(H_2O)PW_{11}O_{39}]^{3-} \cdot H_2O$  | 941.3730     | 941.3963       |
| $[H_3Ag(H_2O)PW_{11}O_{39}]^{3-} \cdot 2H_2O$ | 953.0261     | 953.4033       |

**Table S3.** The Ag-O bond lengths of the crystal of  $K_3[H_3Ag^I PW_{11}O_{39}] \cdot 12H_2O$  and their bond valence

|                    |                              | Bond length (Å)       | $S_i$  | $\Sigma S_i$ | $\Sigma S_i$ |
|--------------------|------------------------------|-----------------------|--------|--------------|--------------|
| Ag(1)-O(7)         | Lacunary O atoms             | 2.337(15)             | 0.2355 | 0.8552       | 1.2029       |
| Ag(1)-O(19)        |                              | 2.412(13)             | 0.2142 |              |              |
| Ag(1)-O(25)        |                              | 2.425(13)             | 0.2068 |              |              |
| Ag(1)-O(17)        |                              | 2.440(14)             | 0.1987 |              |              |
| Ag(1)-O(1A)        | Terminal and bridged O atoms | 3.064(15)             | 0.0347 | 0.3475       |              |
| Ag(1)-O(16A)       |                              | 2.542(15)             | 0.1508 |              |              |
| Ag(1)-O(21A)       |                              | 2.821(15)             | 0.0709 |              |              |
| Ag(1)-O(35A)       |                              | 2.737(15)             | 0.0890 |              |              |
| Ag-OH <sub>2</sub> |                              | 2.268(3) <sup>a</sup> | 0.3160 |              |              |

<sup>b</sup> $S = \exp[(r - r_0)/B]$ , where  $r_0 = 1.842$  and  $B = 0.37$

<sup>a</sup> YOU Wan-Sheng, LI Xing-Xing, FANG Yong, CHENG Hong-Wei, Journal of Liaoning Normal University, 2014, 37(2), 221-226.

<sup>b</sup> I. D. Brown and D. Altermatt, Acta Cryst., 1984, B41, 244.

**Table S4.** Selected bond lengths (Å) and angles (°) for K<sub>3</sub>[H<sub>3</sub>AgPW<sub>11</sub>O<sub>39</sub>]·12H<sub>2</sub>O

|              |           |                  |           |
|--------------|-----------|------------------|-----------|
| Ag(1)-O(7)   | 2.377(15) | W(3)-O(3)        | 1.720(12) |
| Ag(1)-O(9)   | 2.412(13) | W(3)-O(9)        | 1.748(12) |
| Ag(1)-O(25)  | 2.425(13) | W(3)-O(33)       | 1.924(12) |
| Ag(1)-O(17)  | 2.440(14) | W(3)-O(20)       | 1.962(14) |
| O(7)-K(1)    | 2.602(13) | W(3)-O(31)       | 2.116(13) |
| O(25)-K(1)   | 2.634(12) | W(3)-O(5)        | 2.447(11) |
| K(1)-O(4W)   | 2.67(2)   | W(4)-O(25)       | 1.769(11) |
| K(1)-O(19)#2 | 2.741(13) | W(4)-O(24)       | 1.935(12) |
| K(1)-O(8W)   | 2.83(3)   | W(4)-O(16)       | 1.968(12) |
| K(1)-O(35)#2 | 3.071(13) | W(4)-O(21)       | 2.113(11) |
| O(19)-K(2)   | 2.648(13) | W(4)-O(14)       | 2.347(10) |
| K(2)-O(11W)  | 2.72(4)   | W(4)-O(25)       | 1.769(11) |
| K(2)-O(34)#1 | 2.724(15) | W(5)-O(26)       | 1.717(11) |
| K(2)-O(26)#2 | 2.788(12) | W(5)-O(21)       | 1.819(11) |
| K(2)-O(38)#4 | 2.878(12) | W(5)-O(2)        | 1.915(12) |
| K(2)-O(3W)#1 | 2.94(2)   | W(5)-O(1)        | 1.940(11) |
| K(3)-O(6W)   | 2.73(2)   | W(5)-O(18)       | 1.977(12) |
| K(3)-O(22)#2 | 2.859(13) | W(5)-O(12)       | 2.429(10) |
| K(3)-O(9W)#4 | 2.92(3)   | W(6)-O(30)       | 1.735(12) |
| K(3)-O(28)#4 | 2.922(12) | W(6)-O(23)       | 1.869(13) |
| O(17)-K(3)   | 2.745(13) | W(6)-O(11)       | 1.941(12) |
| O(9)-K(3)    | 2.862(15) | W(6)-O(8)        | 1.946(12) |
| O(22)-K(4)   | 2.435(13) | W(6)-O(10)       | 1.950(12) |
| K(4)-O(10W)  | 2.243(19) | W(7)-O(28)       | 1.724(10) |
| K(4)-O(3)#1  | 2.376(14) | W(7)-O(31)       | 1.817(12) |
| K(4)-O(13)#2 | 2.420(12) | W(7)-O(8)        | 1.877(13) |
| K(4)-O(1W)   | 2.61(2)   | W(7)-O(38)       | 1.899(12) |
| K(4)-O(7W)   | 2.61(3)   | W(7)-O(36)       | 1.938(12) |
| W(1)-O(13)   | 1.732(12) | W(8)-O(32)       | 1.673(13) |
| W(1)-O(35)   | 1.828(10) | W(8)-O(15)       | 1.896(11) |
| W(1)-O(1)    | 1.932(10) | W(8)-O(37)       | 1.898(11) |
| W(1)-O(37)   | 1.937(11) | W(8)-O(20)       | 1.917(14) |
| W(1)-O(4)    | 1.983(12) | W(8)-O(38)       | 1.946(11) |
| W(1)-O(12)   | 2.435(10) | W(8)-O(5)        | 2.398(11) |
| W(2)-O(17)   | 1.732(13) | W(9)-O(34)       | 1.724(13) |
| W(2)-O(19)   | 1.739(12) | W(9)-O(7)        | 1.798(13) |
| W(2)-O(15)   | 1.944(10) | W(9)-O(33)       | 1.895(12) |
| W(2)-O(16)   | 1.958(11) | W(9)-O(27)       | 1.978(14) |
| W(2)-O(35)   | 2.125(10) | W(9)-O(23)       | 2.089(13) |
| W(2)-O(14)   | 2.362(10) | W(9)-O(6)        | 2.473(11) |
| W(10)-O(39)  | 1.703(12) | O(17)-W(2)-O(14) | 86.5(5)   |
| W(10)-O(27)  | 1.896(13) | O(19)-W(2)-O(14) | 169.4(5)  |

|                   |           |                  |          |
|-------------------|-----------|------------------|----------|
| W(10)-O(24)       | 1.904(12) | O(15)-W(2)-O(14) | 85.0(4)  |
| W(10)-O(2)        | 1.916(12) | O(16)-W(2)-O(14) | 72.9(4)  |
| W(10)-O(11)       | 1.917(12) | O(35)-W(2)-O(14) | 81.6(4)  |
| W(10)-O(6)        | 2.385(11) | O(3)-W(3)-O(9)   | 106.9(7) |
| W(11)-O(29)       | 1.739(12) | O(3)-W(3)-O(33)  | 103.8(6) |
| W(11)-O(10)       | 1.879(12) | O(9)-W(3)-O(33)  | 95.4(6)  |
| W(11)-O(36)       | 1.903(11) | O(3)-W(3)-O(20)  | 99.9(6)  |
| W(11)-O(18)       | 1.917(12) | O(9)-W(3)-O(20)  | 90.8(6)  |
| W(11)-O(4)        | 1.926(12) | O(33)-W(3)-O(20) | 152.6(5) |
| W(11)-O(12)       | 2.430(11) | O(3)-W(3)-O(31)  | 92.9(6)  |
| O(7)-Ag(1)-O(9)   | 75.2(4)   | O(9)-W(3)-O(31)  | 159.8(6) |
| O(7)-Ag(1)-O(25)  | 76.9(5)   | O(33)-W(3)-O(31) | 83.4(5)  |
| O(9)-Ag(1)-O(25)  | 123.3(4)  | O(20)-W(3)-O(31) | 81.7(5)  |
| O(7)-Ag(1)-O(17)  | 123.7(5)  | O(3)-W(3)-O(5)   | 160.5(5) |
| O(9)-Ag(1)-O(17)  | 77.6(5)   | O(9)-W(3)-O(5)   | 90.7(5)  |
| O(25)-Ag(1)-O(17) | 78.6(4)   | O(33)-W(3)-O(5)  | 82.4(4)  |
| O(13)-W(1)-O(35)  | 103.3(6)  | O(20)-W(3)-O(5)  | 70.8(5)  |
| O(13)-W(1)-O(1)   | 103.4(5)  | O(31)-W(3)-O(5)  | 69.1(4)  |
| O(35)-W(1)-O(1)   | 91.3(5)   | O(22)-W(4)-O(25) | 101.5(6) |
| O(13)-W(1)-O(37)  | 99.4(5)   | O(22)-W(4)-O(24) | 102.3(6) |
| O(35)-W(1)-O(37)  | 89.3(5)   | O(25)-W(4)-O(24) | 93.2(6)  |
| O(1)-W(1)-O(37)   | 156.4(5)  | O(22)-W(4)-O(16) | 99.2(5)  |
| O(13)-W(1)-O(4)   | 98.3(6)   | O(25)-W(4)-O(16) | 96.6(5)  |
| O(35)-W(1)-O(4)   | 158.3(5)  | O(24)-W(4)-O(16) | 154.1(5) |
| O(1)-W(1)-O(4)    | 85.4(5)   | O(22)-W(4)-O(21) | 93.8(5)  |
| O(37)-W(1)-O(4)   | 85.4(5)   | O(25)-W(4)-O(21) | 164.6(5) |
| O(13)-W(1)-O(12)  | 169.7(5)  | O(24)-W(4)-O(21) | 81.4(5)  |
| O(35)-W(1)-O(12)  | 86.2(5)   | O(16)-W(4)-O(21) | 82.9(5)  |
| O(1)-W(1)-O(12)   | 72.1(4)   | O(22)-W(4)-O(14) | 170.4(5) |
| O(37)-W(1)-O(12)  | 84.4(4)   | O(25)-W(4)-O(14) | 85.3(5)  |
| O(4)-W(1)-O(12)   | 72.4(4)   | O(24)-W(4)-O(14) | 84.0(4)  |
| O(17)-W(2)-O(19)  | 101.7(6)  | O(16)-W(4)-O(14) | 73.0(4)  |
| O(17)-W(2)-O(15)  | 93.7(5)   | O(21)-W(4)-O(14) | 79.8(4)  |
| O(19)-W(2)-O(15)  | 100.8(5)  | O(26)-W(5)-O(21) | 104.8(6) |
| O(17)-W(2)-O(16)  | 97.0(5)   | O(26)-W(5)-O(2)  | 102.4(6) |
| O(19)-W(2)-O(16)  | 99.3(5)   | O(21)-W(5)-O(2)  | 89.1(5)  |
| O(15)-W(2)-O(16)  | 154.7(5)  | O(26)-W(5)-O(1)  | 102.8(6) |
| O(17)-W(2)-O(35)  | 167.4(6)  | O(21)-W(5)-O(1)  | 90.8(5)  |
| O(19)-W(2)-O(35)  | 90.6(5)   | O(2)-W(5)-O(1)   | 154.0(5) |
| O(15)-W(2)-O(35)  | 81.2(5)   | O(26)-W(5)-O(18) | 99.8(6)  |
| O(16)-W(2)-O(35)  | 83.4(5)   | O(21)-W(5)-O(18) | 155.4(5) |
| O(2)-W(5)-O(18)   | 85.2(5)   | O(34)-W(9)-O(7)  | 105.3(8) |
| O(1)-W(5)-O(18)   | 84.2(5)   | O(34)-W(9)-O(33) | 101.9(6) |



|                   |          |                   |          |
|-------------------|----------|-------------------|----------|
| O(26)-W(5)-O(12)  | 170.2(5) | O(7)-W(9)-O(33)   | 94.4(6)  |
| O(21)-W(5)-O(12)  | 83.9(5)  | O(34)-W(9)-O(27)  | 102.2(7) |
| O(2)-W(5)-O(12)   | 82.0(5)  | O(7)-W(9)-O(27)   | 93.0(6)  |
| O(1)-W(5)-O(12)   | 72.1(4)  | O(33)-W(9)-O(27)  | 151.9(5) |
| O(18)-W(5)-O(12)  | 71.7(4)  | O(34)-W(9)-O(23)  | 92.9(7)  |
| O(30)-W(6)-O(23)  | 102.0(7) | O(7)-W(9)-O(23)   | 161.7(6) |
| O(30)-W(6)-O(11)  | 101.2(6) | O(33)-W(9)-O(23)  | 83.9(5)  |
| O(23)-W(6)-O(11)  | 88.4(6)  | O(27)-W(9)-O(23)  | 80.6(6)  |
| O(30)-W(6)-O(8)   | 102.2(6) | O(34)-W(9)-O(6)   | 163.2(7) |
| O(23)-W(6)-O(8)   | 91.9(6)  | O(7)-W(9)-O(6)    | 90.3(5)  |
| O(11)-W(6)-O(8)   | 156.0(5) | O(33)-W(9)-O(6)   | 82.6(4)  |
| O(30)-W(6)-O(10)  | 104.4(7) | O(27)-W(9)-O(6)   | 70.2(4)  |
| O(23)-W(6)-O(10)  | 153.5(5) | O(23)-W(9)-O(6)   | 71.4(4)  |
| O(11)-W(6)-O(10)  | 84.9(5)  | O(39)-W(10)-O(27) | 101.2(6) |
| O(8)-W(6)-O(10)   | 84.2(5)  | O(39)-W(10)-O(24) | 103.8(6) |
| O(28)-W(7)-O(31)  | 103.0(6) | O(27)-W(10)-O(24) | 90.6(6)  |
| O(28)-W(7)-O(8)   | 102.3(6) | O(39)-W(10)-O(2)  | 100.9(6) |
| O(31)-W(7)-O(8)   | 90.2(6)  | O(27)-W(10)-O(2)  | 157.6(5) |
| O(28)-W(7)-O(38)  | 101.1(5) | O(24)-W(10)-O(2)  | 87.7(5)  |
| O(31)-W(7)-O(38)  | 90.0(6)  | O(39)-W(10)-O(11) | 99.3(6)  |
| O(8)-W(7)-O(38)   | 156.0(5) | O(27)-W(10)-O(11) | 87.2(6)  |
| O(28)-W(7)-O(36)  | 102.9(5) | O(24)-W(10)-O(11) | 156.8(5) |
| O(31)-W(7)-O(36)  | 154.0(5) | O(2)-W(10)-O(11)  | 85.7(5)  |
| O(8)-W(7)-O(36)   | 83.7(5)  | O(39)-W(10)-O(6)  | 172.7(5) |
| O(38)-W(7)-O(36)  | 85.7(5)  | O(27)-W(10)-O(6)  | 73.5(5)  |
| O(32)-W(8)-O(15)  | 103.3(6) | O(24)-W(10)-O(6)  | 81.6(4)  |
| O(32)-W(8)-O(37)  | 101.5(5) | O(2)-W(10)-O(6)   | 84.1(5)  |
| O(15)-W(8)-O(37)  | 87.7(5)  | O(11)-W(10)-O(6)  | 75.7(5)  |
| O(32)-W(8)-O(20)  | 100.0(6) | O(29)-W(11)-O(10) | 102.2(6) |
| O(15)-W(8)-O(20)  | 90.3(5)  | O(29)-W(11)-O(36) | 101.3(6) |
| O(37)-W(8)-O(20)  | 158.3(5) | O(10)-W(11)-O(36) | 85.4(5)  |
| O(32)-W(8)-O(38)  | 100.6(6) | O(29)-W(11)-O(18) | 101.4(6) |
| O(15)-W(8)-O(38)  | 155.9(5) | O(10)-W(11)-O(18) | 88.6(5)  |
| O(37)-W(8)-O(38)  | 85.0(5)  | O(36)-W(11)-O(18) | 157.3(5) |
| O(20)-W(8)-O(38)  | 88.1(5)  | O(29)-W(11)-O(4)  | 101.4(6) |
| O(32)-W(8)-O(5)   | 170.6(5) | O(10)-W(11)-O(4)  | 156.2(5) |
| O(15)-W(8)-O(5)   | 82.8(4)  | O(36)-W(11)-O(4)  | 88.1(5)  |
| O(37)-W(8)-O(5)   | 85.7(4)  | O(18)-W(11)-O(4)  | 88.7(5)  |
| O(20)-W(8)-O(5)   | 72.6(5)  | O(29)-W(11)-O(12) | 171.9(6) |
| O(38)-W(8)-O(5)   | 73.8(4)  | O(10)-W(11)-O(12) | 83.3(5)  |
| O(18)-W(11)-O(12) | 72.6(4)  | O(36)-W(11)-O(12) | 84.9(4)  |
| O(4)-W(11)-O(12)  | 73.4(4)  |                   |          |

#1 -x+1, -y+1, z-1/2; #2 -x+1, -y+1, z+1/2; #3 x+1/2, -y+3/2, z; #4 x-1/2, -y+3/2, z
